# Supplementary material for: The transcriptome and miRNome profiling of glioblastoma tissues and peritumoral regions highlights molecular pathways shared by tumors and surrounding areas and reveals differences between short-term and long-term survivors
Source: PubMed Central journal article supplement (PMC4673180; doi:10.18632/oncotarget.4151), 2015-06-01
Supplement: oncotarget-06-22526-s001.pdf [file oncotarget-06-22526-s001.pdf]

SUPPLEMENTARY FIGURES AND TABLES

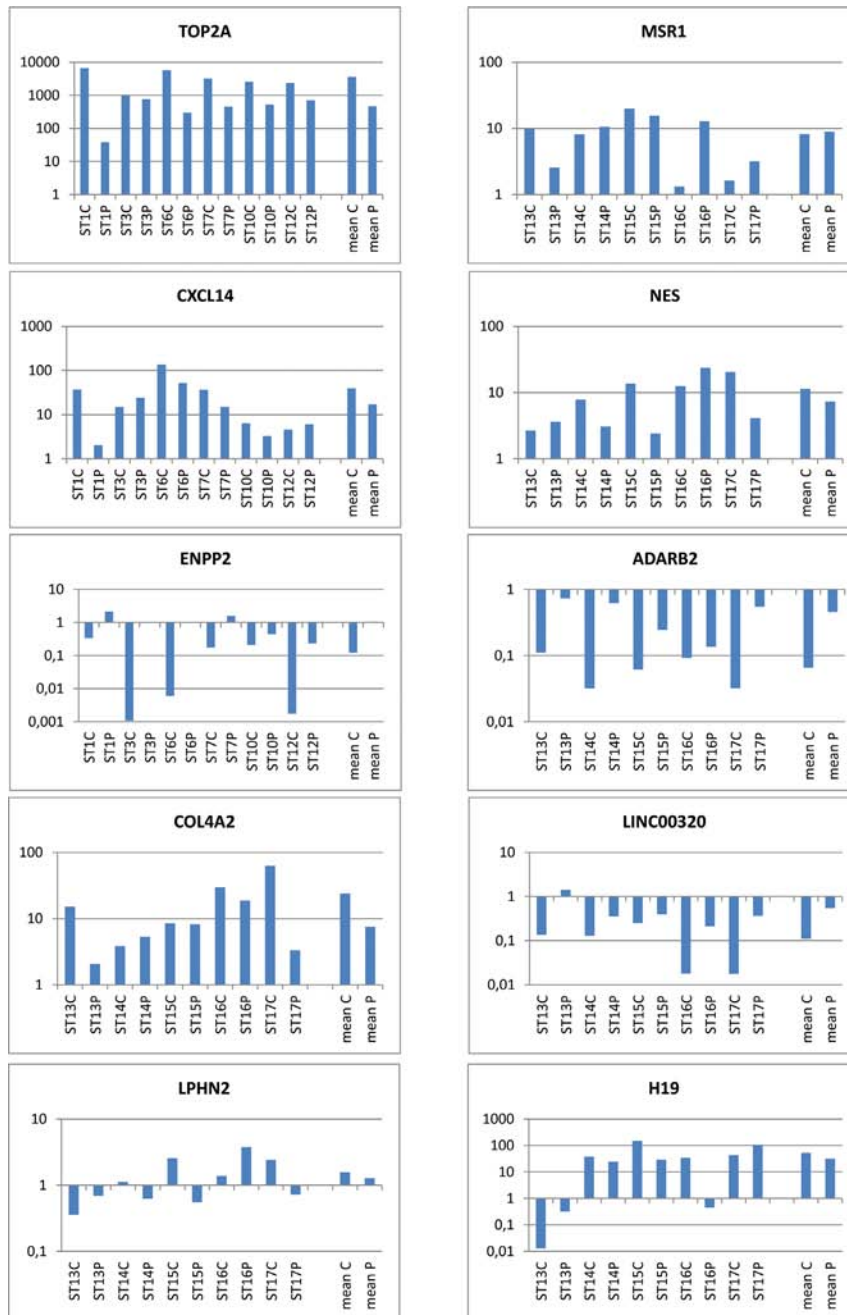

**Supplementary Figure S1: RT-qPCR validation of mRNA expression in STCs and STPs vs healthy white matter.** Values are all presented in a  $\log_{10}$ -based scale with reference to healthy white matter expression, posed = 1, and were calculated using the expression of TBP as the housekeeping normalizer. For each mRNA, expression values of both single samples and average values for STCs and STPs are displayed. ST7, ST10 and ST12 are samples previously analyzed by SAGE, while ST1, ST3, ST6, ST13, ST14, ST15, ST16, and ST17 are new samples.

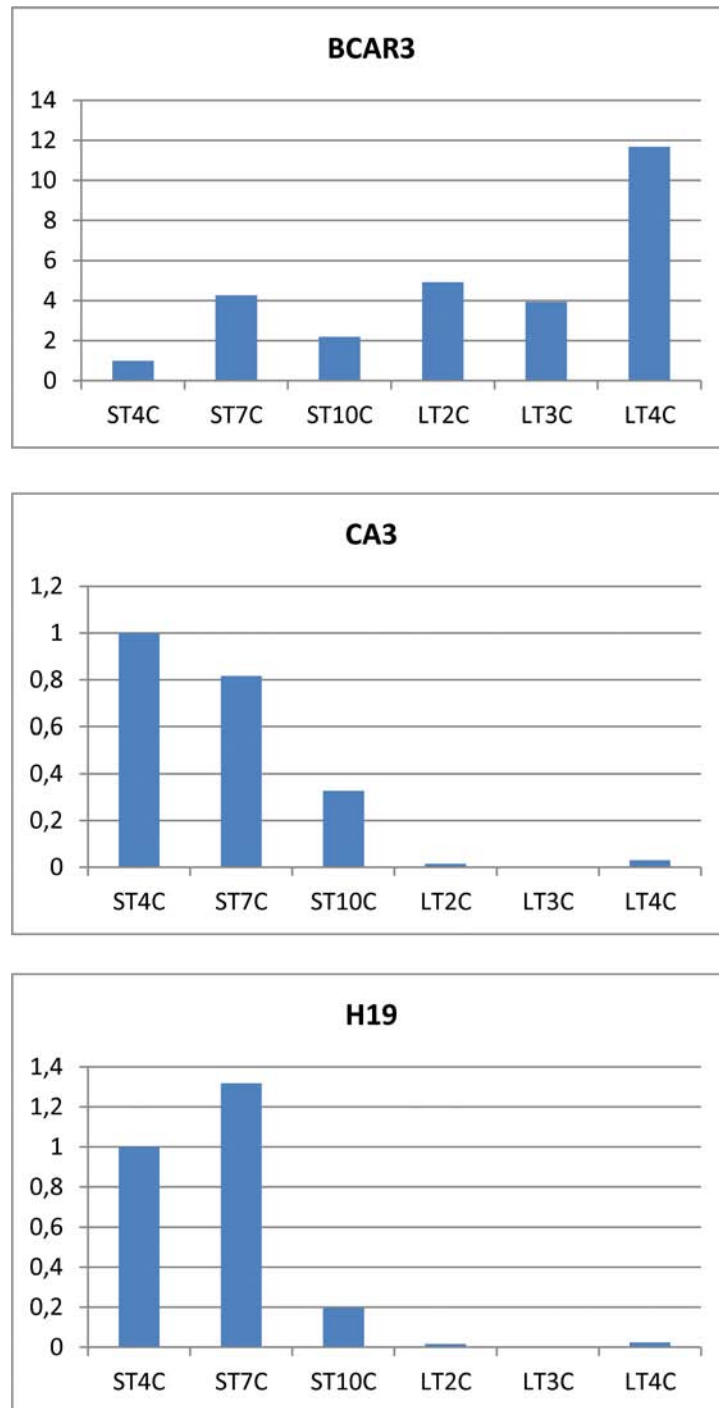

**Supplementary Figure S2: RT-qPCR validation of mRNA expression in STC and LTC samples.** For all three mRNAs, the expression measured in sample ST4C is arbitrarily posed = 1 and the values in the other samples are expressed with reference to ST4C. Values were calculated using the expression of TBP as the housekeeping normalizer.

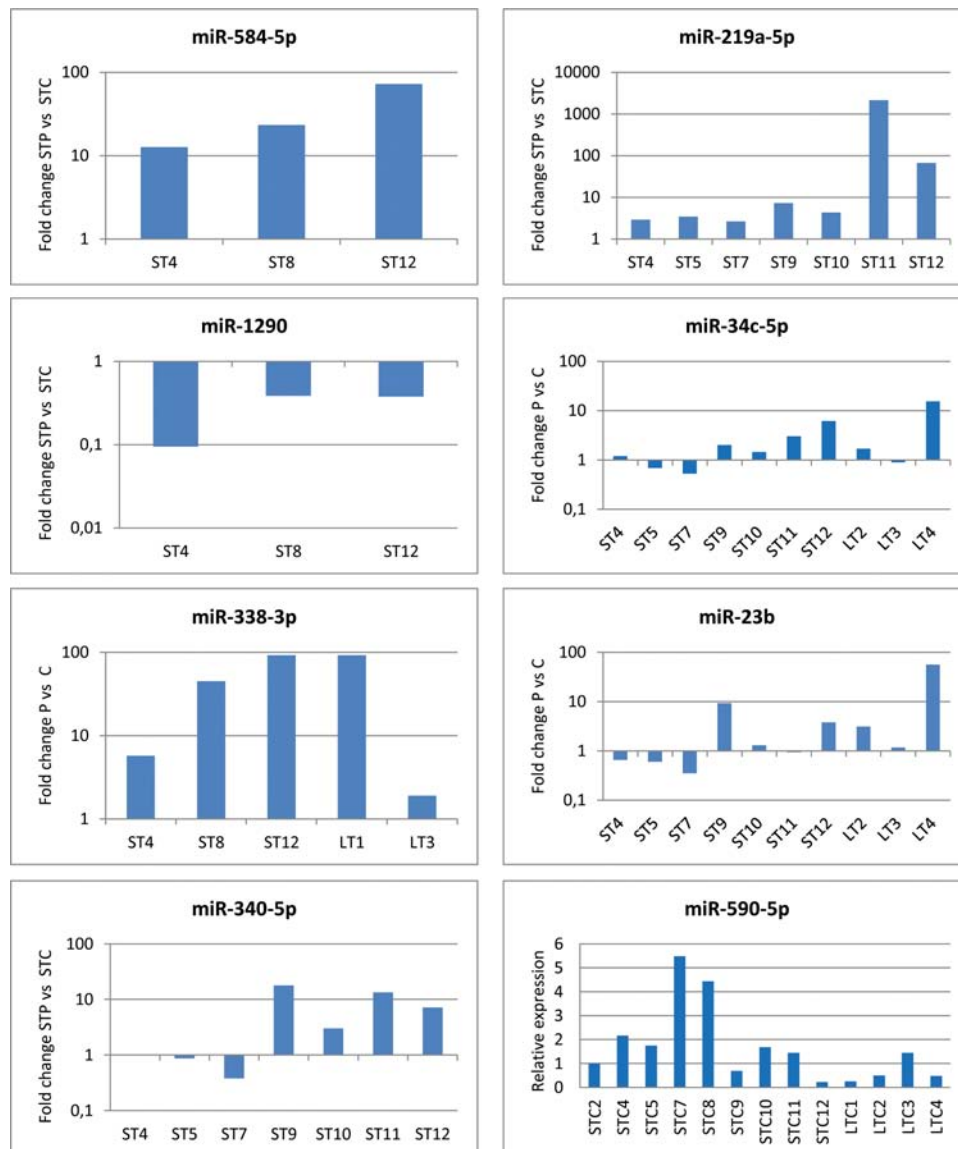

**Supplementary Figure S3: RT-qPCR validation of miRNA differential expression.** In all panels except that of miR-590-5p, values are presented in a  $\text{Log}_{10}$ -based scale and represent the relative expression of each P sample compared to its own C sample. For miR-590-5p, only values for C samples are shown, and the expression of all samples is referred to that of ST2C, arbitrarily posed = 1, in a linear scale. Transcript levels were normalized by U6 expression. ST4, ST7, ST8, ST10, ST11, ST12, LT1, LT2, and LT3 are samples previously analyzed by deep-sequencing, while ST5, ST9 and LT4 did not undergo previous miRNA sequencing.

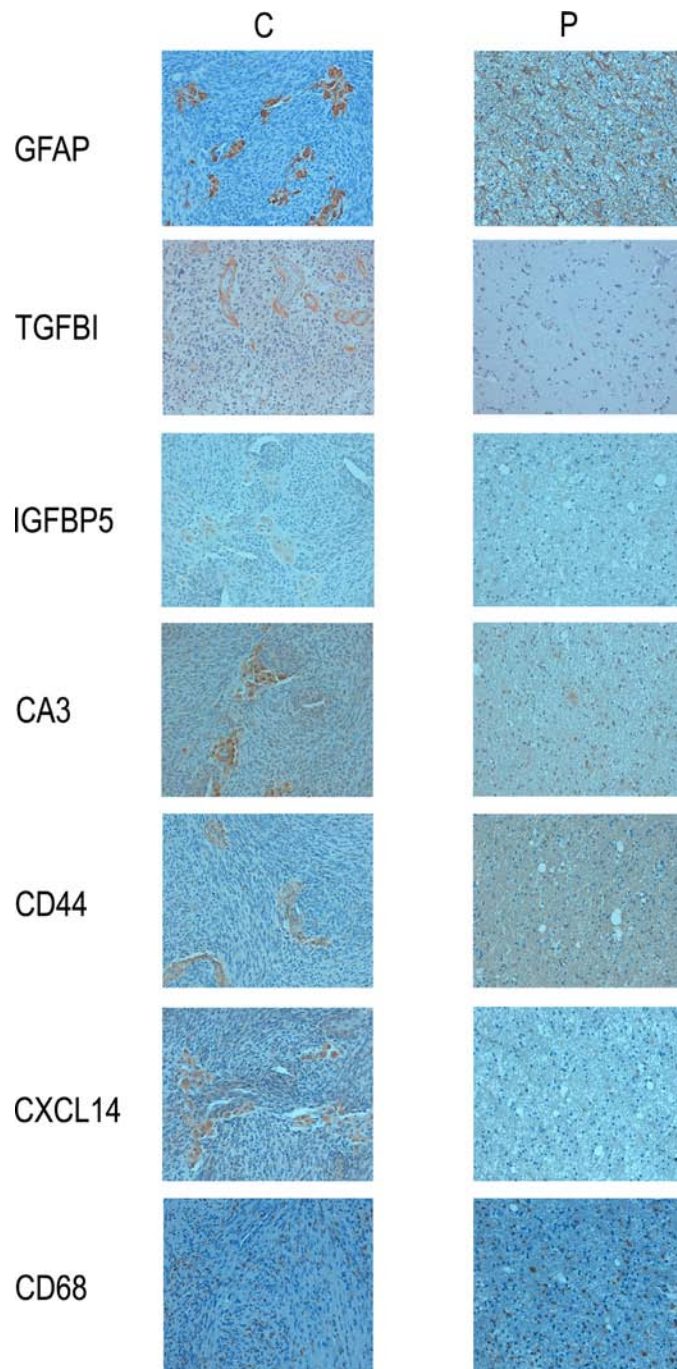

**Supplementary Figure S4: Representative images of IHC staining of C and P samples from ST patients.** Magnification = 20X. Beside specific markers discussed in this work, the staining for GFAP and CD68 is shown, as a measure of the presence of reactive astrocytes and microglia/macrophages, respectively.

**Supplementary Table S1a. The highlighted genes are those in common between ST and LT P vs C comparisons**

| STP vs STC   |           |          |          |              |
|--------------|-----------|----------|----------|--------------|
| NCBI RefSeq  | logFC     | P Value  | FDR      | gene name    |
| NM_002147    | -5.569394 | 0.000055 | 0.012877 | HOXB5        |
| NM_001136030 | -5.264828 | 0.000000 | 0.000435 | KIAA0748     |
| NR_002196    | -5.058820 | 0.000000 | 0.000076 | H19          |
| NM_020346    | -4.741178 | 0.000000 | 0.000261 | SLC17A6      |
| NM_207366    | -4.575584 | 0.000002 | 0.002817 | SEPT14       |
| NM_052947    | -4.344015 | 0.000023 | 0.008316 | ALPK2        |
| NM_015419    | -4.155425 | 0.000005 | 0.003898 | MXRA5        |
| NM_004209    | -4.124442 | 0.000025 | 0.008471 | SYNGR3       |
| NM_152701    | -4.057768 | 0.000091 | 0.016850 | ABCA13       |
| NM_001958    | -3.946988 | 0.000395 | 0.038386 | EEF1A2       |
| NM_002345    | -3.779973 | 0.000005 | 0.003898 | LUM          |
| NM_080617    | -3.771591 | 0.000000 | 0.001221 | CBLN4        |
| NM_003063    | -3.769110 | 0.000156 | 0.024136 | SLN          |
| NM_206963    | -3.698713 | 0.000009 | 0.004814 | RARRES1      |
| NM_003385    | -3.547955 | 0.000356 | 0.036845 | VSNL1        |
| NM_000129    | -3.523695 | 0.000090 | 0.016850 | F13A1        |
| NM_001112741 | -3.503232 | 0.000245 | 0.030715 | KCNC1        |
| NM_000088    | -3.258647 | 0.000087 | 0.016711 | COL1A1       |
| NM_030885    | -3.222203 | 0.000302 | 0.034155 | MAP4         |
| NM_015464    | -3.125329 | 0.000511 | 0.045544 | SOSTDC1      |
| NM_002010    | -3.124320 | 0.000388 | 0.038317 | FGF9         |
| NM_021076    | -3.116797 | 0.000323 | 0.035601 | NEFH         |
| NM_001849    | -3.054699 | 0.000045 | 0.011257 | COL6A2       |
| NM_005328    | -3.032581 | 0.000024 | 0.008316 | HAS2         |
| NM_001195259 | -3.024605 | 0.000424 | 0.040287 | LOC100507588 |
| NM_006308    | -3.003269 | 0.000110 | 0.019241 | HSPB3        |
| NM_000089    | -2.963589 | 0.000065 | 0.014417 | COL1A2       |
| NM_006528    | -2.941053 | 0.000043 | 0.011213 | TFPI2        |
| NM_000093    | -2.861029 | 0.000002 | 0.002817 | COL5A1       |
| NM_015052    | -2.799206 | 0.000196 | 0.026836 | HECW1        |
| NM_002178    | -2.737723 | 0.000071 | 0.014983 | IGFBP6       |
| NM_007224    | -2.672742 | 0.000050 | 0.012037 | NXPH4        |
| NM_198993    | -2.662271 | 0.000015 | 0.006717 | STAC2        |
| NM_014279    | -2.607944 | 0.000119 | 0.020211 | OLFM1        |
| NM_006855    | -2.604514 | 0.000321 | 0.035601 | KDELR3       |

(Continued)

## STP vs STC

| NCBI RefSeq  | logFC     | P Value  | FDR      | gene name |
|--------------|-----------|----------|----------|-----------|
| NM_002523    | -2.571896 | 0.000226 | 0.028610 | NPTX2     |
| NM_001099334 | -2.474862 | 0.000301 | 0.034155 | C2orf80   |
| NM_005297    | -2.470275 | 0.000227 | 0.028639 | MCHR1     |
| NM_015187    | -2.431113 | 0.000005 | 0.003832 | SEL1L3    |
| NM_001010927 | -2.422709 | 0.000096 | 0.017339 | TIAM2     |
| NM_002023    | -2.421199 | 0.000545 | 0.046514 | FMOD      |
| NM_032785    | -2.349596 | 0.000566 | 0.047421 | AGBL4     |
| NM_001962    | -2.337194 | 0.000032 | 0.009627 | EFNA5     |
| NM_133468    | -2.328038 | 0.000032 | 0.009627 | BMPER     |
| NM_001080467 | -2.318882 | 0.000031 | 0.009627 | MYO5B     |
| NM_004976    | -2.207445 | 0.000501 | 0.045267 | KCNC1     |
| NM_052899    | -2.196373 | 0.000293 | 0.034078 | GPRIN1    |
| NM_020939    | -2.161106 | 0.000164 | 0.024483 | CPNE5     |
| NM_152774    | -2.121101 | 0.000478 | 0.043523 | TMEM196   |
| NM_173567    | -2.115181 | 0.000264 | 0.032688 | EPHX4     |
| NM_023940    | -2.007290 | 0.000264 | 0.032688 | RASL11B   |
| NM_006818    | -1.995112 | 0.000183 | 0.025647 | MLLT11    |
| NM_021020    | -1.969728 | 0.000518 | 0.045544 | LZTS1     |
| NM_000474    | -1.961860 | 0.000337 | 0.035986 | TWIST1    |
| NM_012419    | -1.958399 | 0.000039 | 0.010711 | RGS17     |
| NM_000313    | -1.923526 | 0.000348 | 0.036561 | PROS1     |
| NM_001661    | -1.890931 | 0.000086 | 0.016711 | ARL4D     |
| NM_152308    | -1.871535 | 0.000328 | 0.035775 | RMI2      |
| NM_173582    | -1.842811 | 0.000316 | 0.035233 | PGM2L1    |
| NM_080927    | -1.821366 | 0.000294 | 0.034078 | DCBLD2    |
| NM_001848    | -1.816115 | 0.000550 | 0.046545 | COL6A1    |
| NM_031455    | -1.794091 | 0.000426 | 0.040287 | CCDC3     |
| NM_002081    | -1.787275 | 0.000022 | 0.008239 | GPC1      |
| NM_139055    | -1.749625 | 0.000408 | 0.039279 | ADAMTS15  |
| NM_018110    | -1.722781 | 0.000446 | 0.041259 | DOK4      |
| NM_152745    | -1.716040 | 0.000394 | 0.038386 | NXPH1     |
| NM_002254    | -1.688398 | 0.000211 | 0.027793 | KIF3C     |
| NM_018159    | -1.571331 | 0.000201 | 0.027359 | NUDT11    |
| NM_001029858 | -1.568188 | 0.000443 | 0.041259 | SLC35F1   |
| NM_153367    | 1.423345  | 0.000071 | 0.014983 | ZCCHC24   |

(Continued)

## STP vs STC

| NCBI RefSeq  | logFC    | P Value  | FDR      | gene name |
|--------------|----------|----------|----------|-----------|
| NM_001128228 | 1.468162 | 0.000518 | 0.045544 | TPRN      |
| NM_013995    | 1.522396 | 0.000128 | 0.021051 | LAMP2     |
| NM_000097    | 1.527156 | 0.000175 | 0.025115 | CPOX      |
| NR_033258    | 1.531945 | 0.000604 | 0.049716 | ZEB2      |
| NM_207342    | 1.539587 | 0.000534 | 0.046379 | STEAP1B   |
| NM_004232    | 1.553772 | 0.000330 | 0.035790 | SOCS6     |
| NM_002163    | 1.621962 | 0.000389 | 0.038317 | IRF8      |
| NM_007170    | 1.630647 | 0.000068 | 0.014755 | TESK2     |
| NM_017831    | 1.640681 | 0.000404 | 0.039110 | RNF125    |
| NM_181809    | 1.646801 | 0.000280 | 0.033486 | BMP8A     |
| NM_006820    | 1.651685 | 0.000569 | 0.047565 | IFI44L    |
| NM_015254    | 1.676724 | 0.000347 | 0.036561 | KIF13B    |
| NM_021205    | 1.677523 | 0.000160 | 0.024402 | RHOU      |
| NM_052905    | 1.681206 | 0.000175 | 0.025115 | FMNL2     |
| NM_148893    | 1.694634 | 0.000097 | 0.017362 | SVIP      |
| NM_024761    | 1.703754 | 0.000116 | 0.019898 | MOB3B     |
| NM_000891    | 1.737725 | 0.000166 | 0.024576 | KCNJ2     |
| NM_007168    | 1.739964 | 0.000145 | 0.023071 | ABCA8     |
| NR_028038    | 1.770627 | 0.000280 | 0.033486 | GATS      |
| NM_005028    | 1.772968 | 0.000265 | 0.032688 | PIP4K2A   |
| NM_021202    | 1.791188 | 0.000095 | 0.017289 | TP53INP2  |
| NM_207578    | 1.823209 | 0.000586 | 0.048767 | PRKACB    |
| NM_024871    | 1.834248 | 0.000010 | 0.005100 | MAP6D1    |
| NM_017762    | 1.840787 | 0.000388 | 0.038317 | MTMR10    |
| NM_000271    | 1.842677 | 0.000075 | 0.015356 | NPC1      |
| NM_005099    | 1.872770 | 0.000044 | 0.011213 | ADAMTS4   |
| NM_001085486 | 1.889470 | 0.000212 | 0.027793 | SEPP1     |
| NM_001093726 | 1.889786 | 0.000195 | 0.026836 | SEPP1     |
| NM_004140    | 1.895692 | 0.000033 | 0.009627 | LLGL1     |
| NM_005410    | 1.903017 | 0.000163 | 0.024418 | SEPP1     |
| NR_037595    | 1.917627 | 0.000371 | 0.037586 | LOC646576 |
| NM_020698    | 1.924270 | 0.000039 | 0.010711 | TMCC3     |
| NM_012113    | 1.932122 | 0.000020 | 0.008002 | CA14      |
| NM_152588    | 1.933588 | 0.000101 | 0.017868 | TMTC2     |
| NM_133477    | 1.952816 | 0.000019 | 0.007861 | SYNPO2    |

(Continued)

## STP vs STC

| NCBI RefSeq  | logFC    | P Value  | FDR      | gene name    |
|--------------|----------|----------|----------|--------------|
| NM_001101387 | 1.984942 | 0.000003 | 0.002818 | PIRT         |
| NM_018342    | 2.045989 | 0.000045 | 0.011213 | TMEM144      |
| NM_014442    | 2.066763 | 0.000086 | 0.016711 | SIGLEC8      |
| NM_001001669 | 2.080482 | 0.000091 | 0.016850 | ARHGEF37     |
| NR_045555    | 2.091795 | 0.000338 | 0.035986 | ENPP2        |
| NM_181789    | 2.121969 | 0.000377 | 0.037834 | GLDN         |
| NR_024100    | 2.132853 | 0.000113 | 0.019672 | LINC00323    |
| NM_031453    | 2.143295 | 0.000039 | 0.010711 | FAM107B      |
| NM_175922    | 2.149763 | 0.000013 | 0.006267 | PRR18        |
| NM_006272    | 2.162147 | 0.000005 | 0.003898 | S100B        |
| NM_001004298 | 2.197380 | 0.000216 | 0.027992 | C10orf90     |
| NM_032515    | 2.207265 | 0.000011 | 0.005352 | BOK          |
| NM_002612    | 2.219324 | 0.000180 | 0.025569 | PDK4         |
| NM_001162995 | 2.232474 | 0.000030 | 0.009627 | C17orf109    |
| NM_002984    | 2.246163 | 0.000447 | 0.041259 | CCL4         |
| NM_015549    | 2.247016 | 0.000513 | 0.045544 | PLEKHG3      |
| NM_024577    | 2.251457 | 0.000022 | 0.008239 | SH3TC2       |
| NR_046117    | 2.269716 | 0.000004 | 0.003147 | ELOVL1       |
| NM_199355    | 2.290626 | 0.000491 | 0.044541 | ADAMTS18     |
| NM_006557    | 2.320626 | 0.000153 | 0.024020 | DMRT2        |
| NM_016235    | 2.323020 | 0.000025 | 0.008471 | GPRC5B       |
| NM_033133    | 2.332784 | 0.000032 | 0.009627 | CNP          |
| NR_033862    | 2.362308 | 0.000014 | 0.006457 | DKFZp451B082 |
| NM_181712    | 2.363229 | 0.000001 | 0.002474 | KANK4        |
| NM_021979    | 2.411617 | 0.000000 | 0.000696 | HSPA2        |
| NM_001063    | 2.450865 | 0.000003 | 0.003074 | TF           |
| NM_015194    | 2.524840 | 0.000010 | 0.005100 | MYO1D        |
| NM_020459    | 2.545756 | 0.000120 | 0.020262 | PAIP2B       |
| NM_015993    | 2.579223 | 0.000041 | 0.010854 | PLLP         |
| NM_182623    | 2.584754 | 0.000054 | 0.012780 | FAM131C      |
| NM_018685    | 2.618145 | 0.000002 | 0.002600 | ANLN         |
| NM_182935    | 2.636373 | 0.000376 | 0.037834 | MOBP         |
| NM_153034    | 2.682167 | 0.000310 | 0.034710 | ZNF488       |
| NM_173084    | 2.704189 | 0.000001 | 0.001408 | TRIM59       |

(Continued)



## STP vs STC

| NCBI RefSeq  | logFC    | P Value  | FDR      | gene name |
|--------------|----------|----------|----------|-----------|
| NM_020435    | 2.706738 | 0.000007 | 0.004299 | GJC2      |
| NM_198406    | 2.767860 | 0.000051 | 0.012128 | PAQR6     |
| NM_005076    | 2.783902 | 0.000005 | 0.003832 | CNTN2     |
| NM_001142287 | 2.834277 | 0.000002 | 0.002817 | SEMA4D    |
| NM_016533    | 2.874302 | 0.000004 | 0.003147 | NINJ2     |
| NM_020715    | 2.912580 | 0.000001 | 0.001576 | PLEKHH1   |
| NM_012128    | 2.923552 | 0.000293 | 0.034078 | CLCA4     |
| NM_144626    | 2.948181 | 0.000087 | 0.016711 | TMEM125   |
| NM_003657    | 2.987106 | 0.000007 | 0.004351 | BCAS1     |
| NM_001252511 | 3.077118 | 0.000551 | 0.046545 | SOAT1     |
| NM_014717    | 3.121805 | 0.000021 | 0.008185 | ZNF536    |
| NM_024306    | 3.133304 | 0.000022 | 0.008239 | FA2H      |
| NR_024090    | 3.134724 | 0.000007 | 0.004272 | LINC00320 |
| NM_001252512 | 3.187203 | 0.000278 | 0.033486 | SOAT1     |
| NM_014698    | 3.187544 | 0.000047 | 0.011594 | TMEM63A   |
| NM_004525    | 3.267668 | 0.000003 | 0.003074 | LRP2      |
| NR_037155    | 3.320605 | 0.000014 | 0.006513 | SEPT4     |
| NM_003101    | 3.438315 | 0.000071 | 0.014983 | SOAT1     |
| NM_012276    | 3.668811 | 0.000001 | 0.001576 | LILRA4    |
| NM_001757    | 4.067284 | 0.000007 | 0.004272 | CBR1      |
| NM_012125    | 4.082389 | 0.000008 | 0.004691 | CHRM5     |
| NM_178172    | 4.423640 | 0.000000 | 0.000115 | GPIHBP1   |
| NM_001015049 | 4.759540 | 0.000173 | 0.025102 | BAG5      |
| NM_004873    | 4.988192 | 0.000068 | 0.014755 | BAG5      |
| NM_000371    | 5.045914 | 0.000044 | 0.011213 | TTR       |
| NM_001015048 | 5.494646 | 0.000007 | 0.004224 | BAG5      |

**Supplementary Table S1b. The highlighted genes are those in common between ST and LT P vs C comparisons**

| LTP vs LTC   |            |          |         |         |
|--------------|------------|----------|---------|---------|
| NCBI Ref seq | gene name  | logFC    | P Value | FDR     |
| NM_003385    | VSNL1      | -5.77575 | 0.00000 | 0.00237 |
| NM_144967    | ARHGAP36   | -5.33704 | 0.00000 | 0.00044 |
| NM_005458    | GABBR2     | -4.98110 | 0.00000 | 0.00003 |
| NM_153836    | CREG2      | -4.39906 | 0.00004 | 0.00727 |
| NM_178539    | FAM19A2    | -4.21712 | 0.00002 | 0.00619 |
| NR_024281    | LOC157627  | -4.00905 | 0.00029 | 0.02957 |
| NM_152447    | LRFN5      | -3.71344 | 0.00035 | 0.03237 |
| NM_001137560 | TMEM151B   | -3.68679 | 0.00040 | 0.03630 |
| NM_015576    | ERC2       | -3.57882 | 0.00003 | 0.00727 |
| NM_006317    | BASP1      | -3.53838 | 0.00005 | 0.00929 |
| NM_044472    | CDC42      | -3.53243 | 0.00010 | 0.01414 |
| NM_001040272 | ADAMTSL1   | -3.52433 | 0.00013 | 0.01747 |
| NM_003026    | SH3GL2     | -3.50989 | 0.00034 | 0.03237 |
| NM_006931    | SLC2A3     | -3.43415 | 0.00001 | 0.00316 |
| NM_023004    | RTN4R      | -3.35136 | 0.00007 | 0.01037 |
| NM_030965    | ST6GALNAC5 | -3.18779 | 0.00048 | 0.04062 |
| NM_014632    | MICAL2     | -3.15741 | 0.00056 | 0.04495 |
| NM_173582    | PGM2L1     | -3.09246 | 0.00003 | 0.00727 |
| NM_198993    | STAC2      | -3.07060 | 0.00057 | 0.04495 |
| NM_001031701 | NT5DC3     | -3.02988 | 0.00032 | 0.03184 |
| NM_016588    | NRN1       | -2.98659 | 0.00004 | 0.00820 |
| NM_001554    | CYR61      | -2.96192 | 0.00006 | 0.00936 |
| NM_005809    | PRDX2      | -2.94262 | 0.00035 | 0.03237 |
| NM_001110199 | SRRM3      | -2.77553 | 0.00065 | 0.04992 |
| NM_006818    | MLLT11     | -2.58536 | 0.00059 | 0.04659 |
| NM_016533    | NINJ2      | 2.51378  | 0.00056 | 0.04495 |
| NM_007168    | ABCA8      | 2.55726  | 0.00045 | 0.03917 |
| NM_005028    | PIP4K2A    | 2.67217  | 0.00063 | 0.04904 |
| NM_181789    | GLDN       | 2.69397  | 0.00046 | 0.03917 |
| NM_001162995 | C17orf109  | 2.80857  | 0.00019 | 0.02276 |
| NM_020717    | SHROOM4    | 2.90007  | 0.00014 | 0.01874 |
| NM_001982    | ERBB3      | 2.90248  | 0.00027 | 0.02793 |
| NM_015993    | PLLP       | 2.90935  | 0.00021 | 0.02400 |

(Continued)

## LTP vs LTC

| NCBI Ref seq | gene name | logFC   | P Value | FDR     |
|--------------|-----------|---------|---------|---------|
| NM_032515    | BOK       | 2.92561 | 0.00015 | 0.01917 |
| NM_024871    | MAP6D1    | 2.93555 | 0.00030 | 0.02957 |
| NM_024577    | SH3TC2    | 2.93835 | 0.00035 | 0.03237 |
| NM_006557    | DMRT2     | 2.99564 | 0.00023 | 0.02492 |
| NM_033133    | CNP       | 3.00237 | 0.00041 | 0.03638 |
| NM_020715    | PLEKHH1   | 3.23699 | 0.00006 | 0.00936 |
| NM_001142287 | SEMA4D    | 3.29139 | 0.00027 | 0.02793 |
| NM_001063    | TF        | 3.32732 | 0.00008 | 0.01108 |
| NM_006941    | SOX10     | 3.34967 | 0.00049 | 0.04080 |
| NM_005099    | ADAMTS4   | 3.35816 | 0.00003 | 0.00727 |
| NM_001853    | COL9A3    | 3.36572 | 0.00001 | 0.00269 |
| NM_021202    | TP53INP2  | 3.39829 | 0.00005 | 0.00927 |
| NR_002798    | NAPSB     | 3.43986 | 0.00001 | 0.00237 |
| NM_016229    | CYB5R2    | 3.45520 | 0.00003 | 0.00727 |
| NM_175922    | PRR18     | 3.51599 | 0.00004 | 0.00820 |
| NM_018342    | TMEM144   | 3.59207 | 0.00016 | 0.02010 |
| NM_020435    | GJC2      | 3.61790 | 0.00001 | 0.00237 |
| NM_021979    | HSPA2     | 3.64306 | 0.00003 | 0.00727 |
| NM_012113    | CA14      | 3.65241 | 0.00000 | 0.00237 |
| NM_005076    | CNTN2     | 3.66118 | 0.00005 | 0.00908 |
| NR_045555    | ENPP2     | 3.67276 | 0.00006 | 0.00936 |
| NM_080865    | GPR62     | 3.70338 | 0.00022 | 0.02446 |
| NM_024306    | FA2H      | 3.75565 | 0.00006 | 0.00936 |
| NM_018685    | ANLN      | 3.83841 | 0.00000 | 0.00237 |
| NM_178172    | GPIHBP1   | 3.85776 | 0.00000 | 0.00237 |
| NM_144626    | TMEM125   | 3.88994 | 0.00019 | 0.02276 |
| NM_003657    | BCAS1     | 3.90917 | 0.00008 | 0.01161 |
| NM_198406    | PAQR6     | 4.07819 | 0.00000 | 0.00237 |
| NM_012128    | CLCA4     | 4.10237 | 0.00004 | 0.00727 |
| NM_014698    | TMEM63A   | 4.11341 | 0.00000 | 0.00129 |
| NM_080658    | ACY3      | 4.30452 | 0.00004 | 0.00727 |
| NM_005276    | GPD1      | 4.53908 | 0.00001 | 0.00390 |
| NM_004525    | LRP2      | 4.60256 | 0.00001 | 0.00269 |
| NM_001757    | CBR1      | 4.87779 | 0.00000 | 0.00191 |
| NM_012276    | LILRA4    | 4.98385 | 0.00000 | 0.00044 |
| NM_182935    | MOBP      | 5.20110 | 0.00000 | 0.00211 |

**Supplementary Table S2a. Functional Annotation Clustering of predicted targets of miR-376c edited only.** Listed are the four top-ranking annotation clusters, characterized by Terms with a *p* (modified Fisher Exact *P*-Value) < 0.05. The “Count” column indicates the number of genes involved in the relative enriched term.

| <b>Annotation Cluster 1</b> |                                                 | <b>Enrichment Score: 1.8275</b> |                |
|-----------------------------|-------------------------------------------------|---------------------------------|----------------|
| <b>Category</b>             | <b>Term</b>                                     | <b>Count</b>                    | <b>P Value</b> |
| GOTERM_CC_FAT               | GO:0030135~coated vesicle                       | 14                              | 0.00014        |
| GOTERM_CC_FAT               | GO:0016023~cytoplasmic membrane-bounded vesicle | 27                              | 0.001          |
| GOTERM_CC_FAT               | GO:0030136~clathrin-coated vesicle              | 11                              | 0.0015         |
| GOTERM_CC_FAT               | GO:0031988~membrane-bounded vesicle             | 27                              | 0.0016         |
| GOTERM_CC_FAT               | GO:0030659~cytoplasmic vesicle membrane         | 10                              | 0.0070         |
| GOTERM_CC_FAT               | GO:0031410~cytoplasmic vesicle                  | 27                              | 0.0079         |
| GOTERM_CC_FAT               | GO:0012506~vesicle membrane                     | 10                              | 0.0118         |
| GOTERM_CC_FAT               | GO:0031982~vesicle                              | 27                              | 0.0131         |
| GOTERM_CC_FAT               | GO:0044433~cytoplasmic vesicle part             | 11                              | 0.0166         |
| GOTERM_CC_FAT               | GO:0008021~synaptic vesicle                     | 5                               | 0.1148         |

| <b>Annotation Cluster 2</b> |                                                                       | <b>Enrichment Score: 1.9777</b> |                |
|-----------------------------|-----------------------------------------------------------------------|---------------------------------|----------------|
| <b>Category</b>             | <b>Term</b>                                                           | <b>Count</b>                    | <b>P Value</b> |
| KEGG_PATHWAY                | hsa04340:Hedgehog signaling pathway                                   | 7                               | 0.0025         |
| KEGG_PATHWAY                | hsa04310:Wnt signaling pathway                                        | 11                              | 0.0042         |
| GOTERM_BP_FAT               | GO:0016055~Wnt receptor signaling pathway                             | 10                              | 0.0092         |
| KEGG_PATHWAY                | hsa04916:Melanogenesis                                                | 8                               | 0.0114         |
| KEGG_PATHWAY                | hsa05217:Basal cell carcinoma                                         | 6                               | 0.0115         |
| GOTERM_BP_FAT               | GO:0007223~Wnt receptor signaling pathway, calcium modulating pathway | 3                               | 0.1065         |

| <b>Annotation Cluster 3</b> |                                         | <b>Enrichment Score: 1.9749</b> |                |
|-----------------------------|-----------------------------------------|---------------------------------|----------------|
| <b>Category</b>             | <b>Term</b>                             | <b>Count</b>                    | <b>P Value</b> |
| GOTERM_MF_FAT               | GO:0008270~zinc ion binding             | 85                              | 0.0014         |
| GOTERM_MF_FAT               | GO:0046914~transition metal ion binding | 93                              | 0.0133         |
| GOTERM_MF_FAT               | GO:0046872~metal ion binding            | 131                             | 0.0147         |
| GOTERM_MF_FAT               | GO:0043169~cation binding               | 131                             | 0.0199         |
| GOTERM_MF_FAT               | GO:0043167~ion binding                  | 132                             | 0.0243         |

**Supplementary Table S2b. Functional Annotation Clustering of predicted targets of miR-376c non-edited only.** Listed are the four top-ranking annotation clusters, characterized by Terms with a  $p$  (modified Fisher Exact  $P$ -Value)  $< 0.05$ . The “Count” column indicates the number of genes involved in the relative enriched term.

| <b>Annotation Cluster 1</b> |                                                              | <b>Enrichment Score: 1.8275</b> |                |
|-----------------------------|--------------------------------------------------------------|---------------------------------|----------------|
| <b>Category</b>             | <b>Term</b>                                                  | <b>Count</b>                    | <b>P Value</b> |
| GOTERM_MF_FAT               | GO:0051119~sugar transmembrane transporter activity          | 4                               | 0.0015         |
| GOTERM_MF_FAT               | GO:0005355~glucose transmembrane transporter activity        | 3                               | 0.0074         |
| GOTERM_MF_FAT               | GO:0015149~hexose transmembrane transporter activity         | 3                               | 0.0107         |
| GOTERM_MF_FAT               | GO:0015145~monosaccharide transmembrane transporter activity | 3                               | 0.0119         |
| GOTERM_BP_FAT               | GO:0008643~carbohydrate transport                            | 4                               | 0.0184         |
| GOTERM_BP_FAT               | GO:0055085~transmembrane transport                           | 7                               | 0.4227         |
| <b>Annotation Cluster 2</b> |                                                              | <b>Enrichment Score: 1.8031</b> |                |
| <b>Category</b>             | <b>Term</b>                                                  | <b>Count</b>                    | <b>P Value</b> |
| GOTERM_MF_FAT               | GO:0051119~sugar transmembrane transporter activity          | 4                               | 0.0015         |
| GOTERM_MF_FAT               | GO:0005402~cation:sugar symporter activity                   | 3                               | 0.0085         |
| GOTERM_MF_FAT               | GO:0005351~sugar:hydrogen symporter activity                 | 3                               | 0.0085         |
| GOTERM_BP_FAT               | GO:0008643~carbohydrate transport                            | 4                               | 0.01839        |
| GOTERM_MF_FAT               | GO:0015295~solute:hydrogen symporter activity                | 3                               | 0.0201         |
| GOTERM_MF_FAT               | GO:0015294~solute:cation symporter activity                  | 4                               | 0.0510         |
| GOTERM_MF_FAT               | GO:0015293~symporter activity                                | 4                               | 0.1195         |
| <b>Annotation Cluster 3</b> |                                                              | <b>Enrichment Score: 1.6909</b> |                |
| <b>Category</b>             | <b>Term</b>                                                  | <b>Count</b>                    | <b>P Value</b> |
| GOTERM_BP_FAT               | GO:0009952~anterior/posterior pattern formation              | 7                               | 0.0018         |
| GOTERM_BP_FAT               | GO:0001822~kidney development                                | 4                               | 0.0581         |
| GOTERM_BP_FAT               | GO:0001655~urogenital system development                     | 4                               | 0.0802         |

(Continued)

| Annotation Cluster 4 |                                                         | Enrichment Score: 1.6062 |         |
|----------------------|---------------------------------------------------------|--------------------------|---------|
| Category             | Term                                                    | Count                    | P Value |
| GOTERM_BP_FAT        | GO:0043066~negative regulation of apoptosis             | 11                       | 0.0015  |
| GOTERM_BP_FAT        | GO:0043069~negative regulation of programmed cell death | 11                       | 0.0017  |
| GOTERM_BP_FAT        | GO:0060548~negative regulation of cell death            | 11                       | 0.0017  |
| GOTERM_BP_FAT        | GO:0042981~regulation of apoptosis                      | 16                       | 0.0067  |
| GOTERM_BP_FAT        | GO:0043067~regulation of programmed cell death          | 16                       | 0.0073  |
| GOTERM_BP_FAT        | GO:0010941~regulation of cell death                     | 16                       | 0.0076  |
| GOTERM_BP_FAT        | GO:0006916~anti-apoptosis                               | 5                        | 0.1210  |
| GOTERM_BP_FAT        | GO:0006917~induction of apoptosis                       | 6                        | 0.1707  |
| GOTERM_BP_FAT        | GO:0012502~induction of programmed cell death           | 6                        | 0.1722  |
| GOTERM_BP_FAT        | GO:0043065~positive regulation of apoptosis             | 7                        | 0.2023  |
| GOTERM_BP_FAT        | GO:0043068~positive regulation of programmed cell death | 7                        | 0.2066  |
| GOTERM_BP_FAT        | GO:0010942~positive regulation of cell death            | 7                        | 0.2095  |

**Supplementary Table S3a. SAGE mapping data**

| Sample       |           | Total Reads | Mapped Reads | Pct   |
|--------------|-----------|-------------|--------------|-------|
| LT1          | Core      | 49,880,749  | 9,892,252    | 19.83 |
| LT1          | Periphery | 39,457,660  | 6,995,892    | 17.73 |
| LT2          | Core      | 48,964,296  | 9,608,297    | 19.62 |
| LT2          | Periphery | 41,719,818  | 10,178,915   | 24.40 |
| LT3          | Core      | 52,433,392  | 10,727,457   | 20.46 |
| LT3          | Periphery | 39,458,154  | 8,488,864    | 21.51 |
| LT4          | Core      | 45,988,520  | 9,276,126    | 20.17 |
| LT4          | Periphery | 42,564,349  | 7,761,274    | 18.23 |
| ST2          | Core      | 46,246,926  | 7,259,364    | 15.70 |
| ST2          | Periphery | 34,777,045  | 6,507,229    | 18.71 |
| ST4          | Core      | 40,054,931  | 9,030,532    | 22.55 |
| ST4          | Periphery | 39,798,188  | 5,494,460    | 13.81 |
| ST5          | Core      | 48,285,130  | 15,849,600   | 32.83 |
| ST5          | Periphery | 48,007,450  | 10,476,478   | 21.82 |
| ST7          | Core      | 41,336,824  | 9,385,032    | 22.70 |
| ST7          | Periphery | 35,508,090  | 5,907,134    | 16.64 |
| ST8          | Core      | 50,496,900  | 10,874,303   | 21.53 |
| ST8          | Periphery | 40,965,072  | 8,436,507    | 20.59 |
| ST9          | Core      | 45,707,533  | 9,205,826    | 20.14 |
| ST9          | Periphery | 38,299,947  | 8,189,830    | 21.38 |
| ST10         | Core      | 49,345,681  | 10,884,536   | 22.06 |
| ST10         | Periphery | 43,852,579  | 8,950,219    | 20.41 |
| ST11         | Core      | 55,762,945  | 19,243,136   | 34.51 |
| ST11         | Periphery | 259,944,467 | 67,896,275   | 26.12 |
| ST12         | Core      | 50,982,086  | 17,454,114   | 34.24 |
| ST12         | Periphery | 54,881,420  | 17,709,336   | 32.27 |
| White matter |           | 35,305,044  | 6,830,039    | 19.35 |

**Supplementary Table S3b. microRNA mapping data**

| Sample       |           | Sequenced Reads | ReadsMapped onto genome | ReadsMapped onto miRBase 20 |
|--------------|-----------|-----------------|-------------------------|-----------------------------|
| LT1          | Core      | 44,151,333      | 29,433,911              | 20,275,943                  |
| LT1          | Periphery | 44,703,697      | 18,328,838              | 11,546,461                  |
| LT2          | Core      | 37,720,303      | 19,065,877              | 8,713,172                   |
| LT2          | Periphery | 44,306,549      | 20,245,773              | 8,055,664                   |
| LT3          | Core      | 63,464,393      | 34,661,519              | 12,730,728                  |
| LT3          | Periphery | 51,482,767      | 28,682,529              | 15,769,018                  |
| ST2          | Core      | 43,075,651      | 21,041,870              | 9,803,832                   |
| ST2          | Periphery | 39,880,317      | 26,718,015              | 9,012,741                   |
| ST4          | Core      | 53,652,314      | 28,309,480              | 18,945,949                  |
| ST4          | Periphery | 51,185,318      | 21,628,643              | 10,369,993                  |
| ST7          | Core      | 39,112,199      | 15,142,288              | 10,109,371                  |
| ST7          | Periphery | 31,181,903      | 18,579,603              | 11,877,785                  |
| ST8          | Core      | 33,542,938      | 18,709,721              | 10,198,371                  |
| ST8          | Periphery | 30,924,127      | 15,395,905              | 10,154,977                  |
| ST10         | Core      | 32,555,595      | 18,316,048              | 9,958,965                   |
| ST10         | Periphery | 51,023,372      | 25,279,892              | 9,884,276                   |
| ST11         | Core      | 36,085,311      | 21,198,037              | 12,357,742                  |
| ST11         | Periphery | 35,142,083      | 18,703,494              | 11,913,730                  |
| ST12         | Core      | 40,449,643      | 10,054,210              | 2,747,734                   |
| ST12         | Periphery | 48,362,074      | 17,394,093              | 8,288,585                   |
| White matter |           | 38,848,422      | 22,195,255              | 11,640,032                  |

**Supplementary Table S4. MiRNA differential expression analysis.** We tested differential expressed miRNAs in 10 patients by using a generalized linear model able to handle the paired experimental design. For each miRNA, the table reports the fold change (in log scale), counts per million (in log scale), likelihood ratio (LR), *p*-value, false discovery rate (FDR) and normalized counts in each sample and in the healthy white matter sample (SB).



**Supplementary Table S5. Characteristics of patients analyzed for RT-qPCR validation of deep sequencing data as shown in Suppl Figure 1. ST15 represents an unclear result as for the presence of infiltrating tumor cells in the peritumoral area.**

| Patient | Sex | Age | Survival (months) | Peritumoral infiltration |
|---------|-----|-----|-------------------|--------------------------|
| ST1     | M   | 60  | 12                | no                       |
| ST3     | M   | 65  | 11                | yes                      |
| ST6     | M   | 76  | 15                | no                       |
| ST13    | F   | 71  | 13                | no                       |
| ST14    | M   | 71  | 33                | yes                      |
| ST15    | F   | 59  | 9                 | unclear                  |
| ST16    | M   | 67  | 12                | no                       |
| ST17    | M   | 37  | 4                 | yes                      |
